# Supplementary material for: Single-cell Sequencing Reveals Clearance of Blastula Chromosomal Mosaicism in In Vitro Fertilization Babies
Source: PubMed Central journal article supplement (PMC10225483; doi:10.1016/j.gpb.2022.07.004), 2022-08-06

Fig.S1

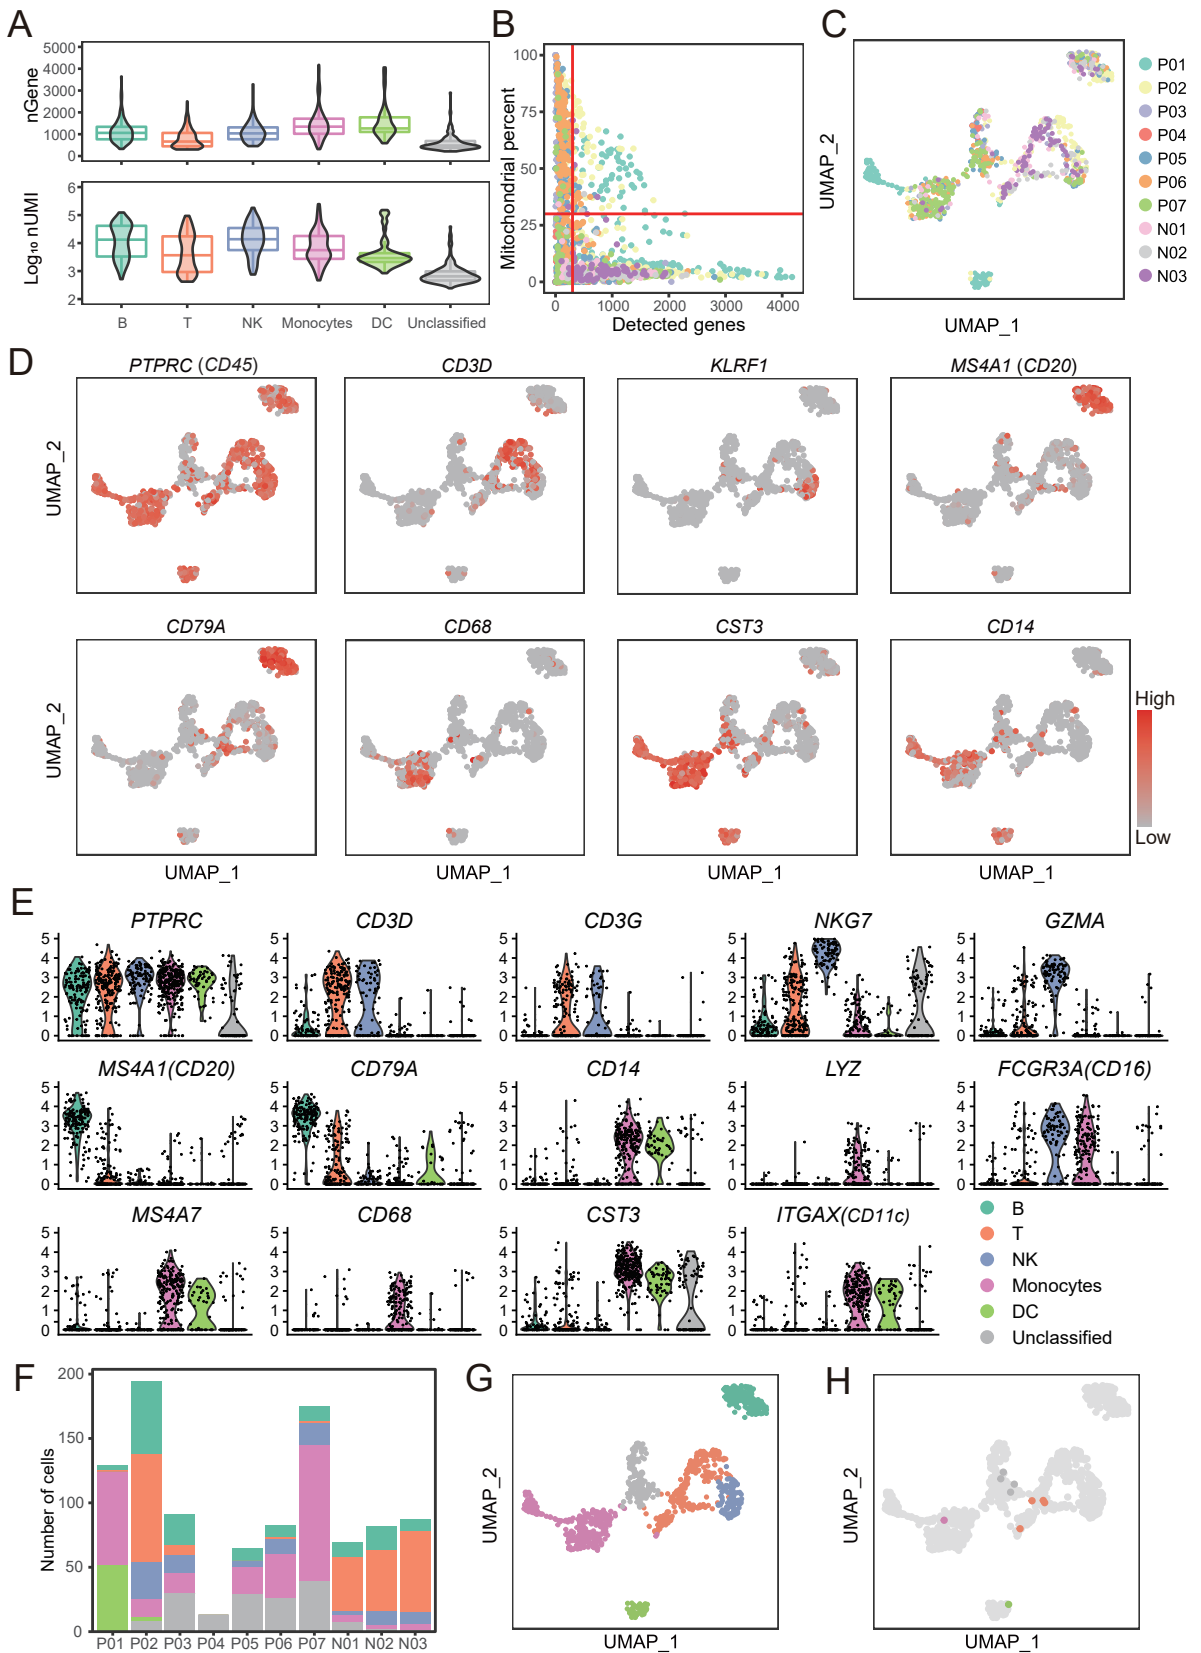

Supplement: mmc1.pdf [file mmc1.pdf]
